# Supplementary material for: One-pot synthesis of carbon-coated Ni5P4 nanoparticles and CoP nanorods for high-rate and high-stability lithium-ion batteries
Source: Royal Society of Chemistry journal article supplement (doi:10.1039/c5ta05338b), 2015-01-01
Supplement: c5ta05338b1.pdf [file c5ta05338b1.pdf]

## Electronic Supplementary Information (ESI)

### One-pot synthesis of carbon-coated Ni<sub>5</sub>P<sub>4</sub> nanoparticles and CoP nanorods for high-rate and high-stability lithium-ion batteries

Jun Jiang,<sup>a,b,c,d</sup> Chunde Wang,<sup>a,b,c,d</sup> Wei Li,<sup>a,b,c,d</sup> Qing Yang\*,<sup>a,b,c,d</sup>

<sup>a</sup> *Hefei National Laboratory of Physical Sciences at the Microscale (HFNL), University of Science and Technology of China (USTC), Hefei 230026, Anhui, P. R. China.*

<sup>b</sup> *Department of Chemistry, USTC, Hefei 230026, Anhui, P. R. China.*

<sup>c</sup> *Laboratory of Nanomaterials for Energy Conversion (LNEC), USTC, Hefei 230026, Anhui, P. R. China.*

<sup>d</sup> *Synergetic Innovation Center of Quantum Information & Quantum Physics, USTC, Hefei 230026, Anhui, P. R. China.*

\* *Corresponding author. E-mail: qyoung@ustc.edu.cn; Fax: +86-551-63606266; Tel: +86-551-63600243.*

**1. EDX spectra for the as-prepared Ni<sub>5</sub>P<sub>4</sub>@C nanoparticles and CoP@C nanorods.**

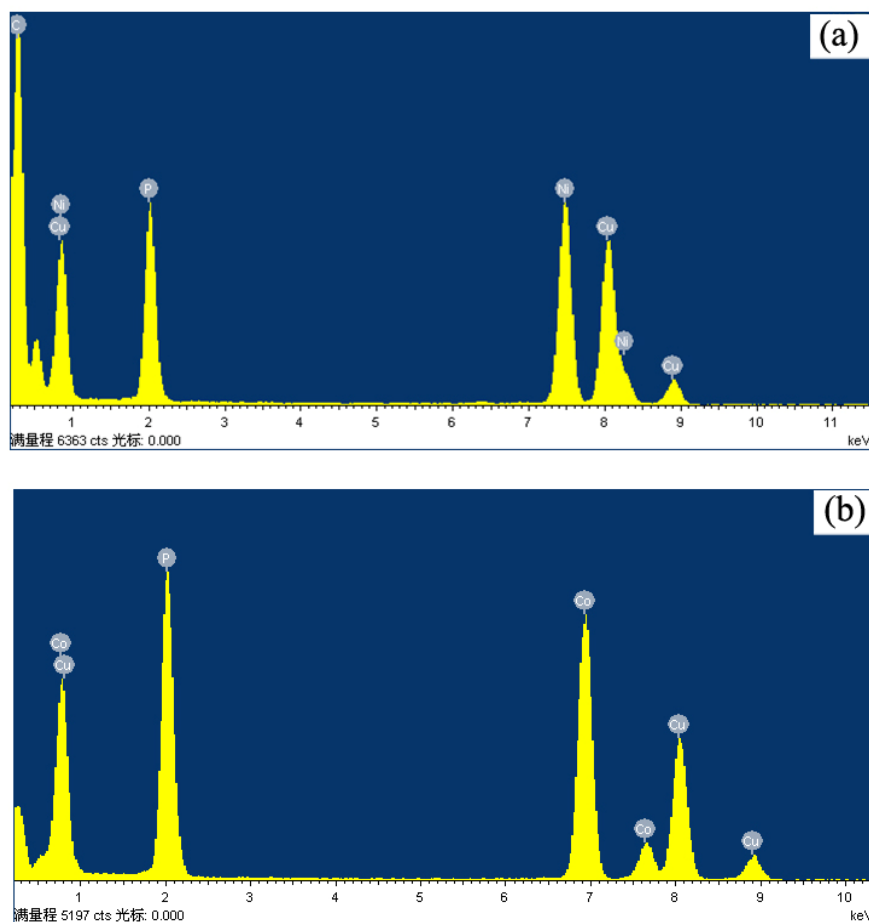

**Fig. S1.** (a) EDX spectra for the as-prepared Ni<sub>5</sub>P<sub>4</sub>@C nanoparticles, and (b) EDX spectra for the as-prepared CoP@C nanorods. The signal of Cu arises from the TEM grids.

**2. Table S1.** C, H and N contents of the as-prepared Ni<sub>5</sub>P<sub>4</sub>@C and CoP@C nanocomposites.

| Sample                            | C-content<br>(wt. %) | H-content<br>(wt. %) | N-content<br>(wt. %) |
|-----------------------------------|----------------------|----------------------|----------------------|
| Ni <sub>5</sub> P <sub>4</sub> @C | 18.65                | 1.24                 | 0.07                 |
| CoP@C                             | 9.72                 | 1.70                 | 0.08                 |

### 3. XPS for the as-prepared Ni<sub>5</sub>P<sub>4</sub>@C nanoparticles.

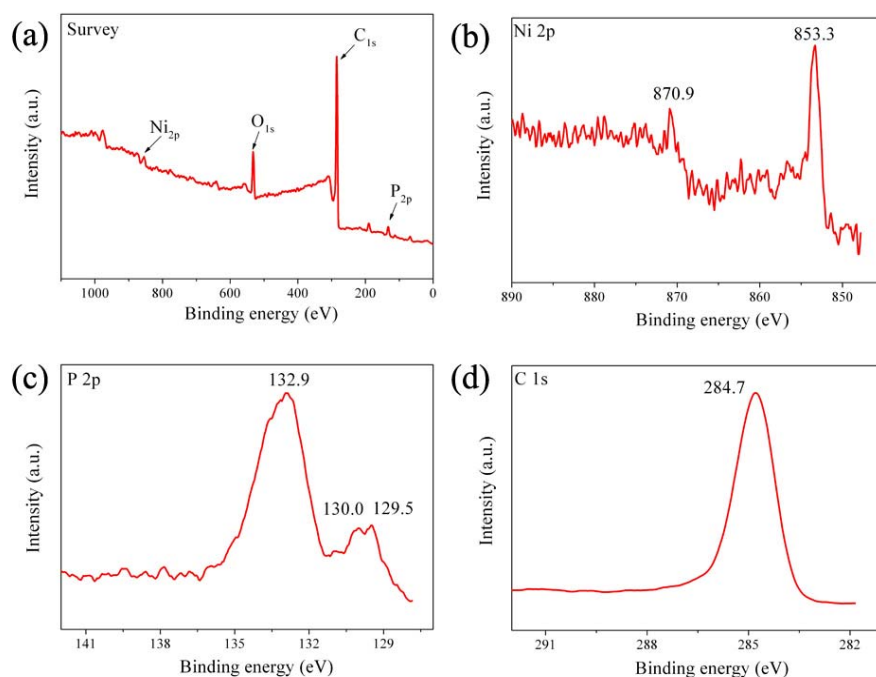

**Fig. S2.** (a) Survey, (b) Ni 2p, (c) P 2p and (d) C 1s XPS spectra collected for Ni<sub>5</sub>P<sub>4</sub>@C nanoparticles.

### 4. XPS for the as-prepared CoP@C nanorods.

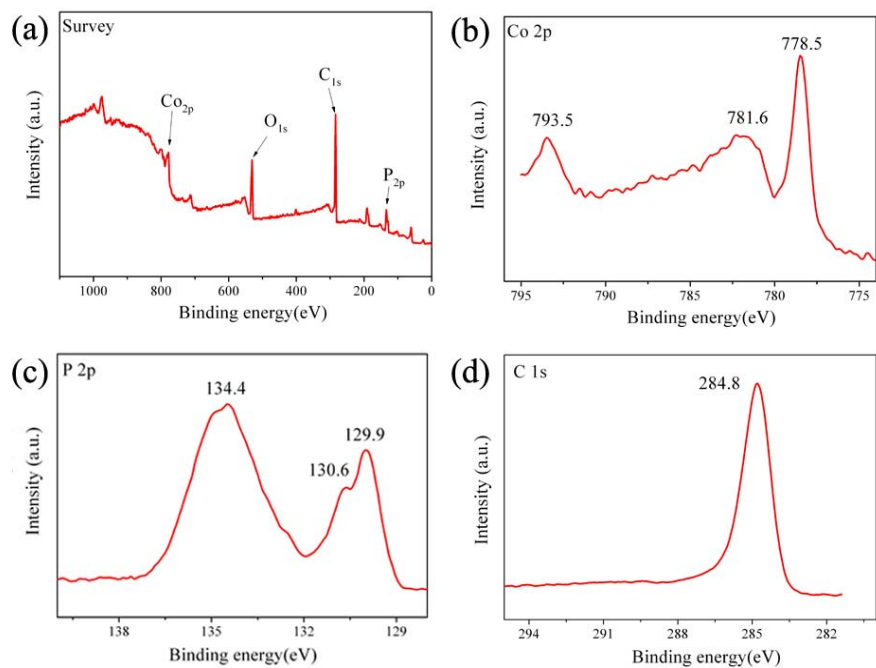

**Fig. S3.** (a) Survey, (b) Co 2p, (c) P 2p and (d) C 1s XPS spectra collected for CoP@C nanorods.

## 5. Cyclic voltammeteries of the Ni<sub>5</sub>P<sub>4</sub>@C nanoparticles and CoP@C nanorods.

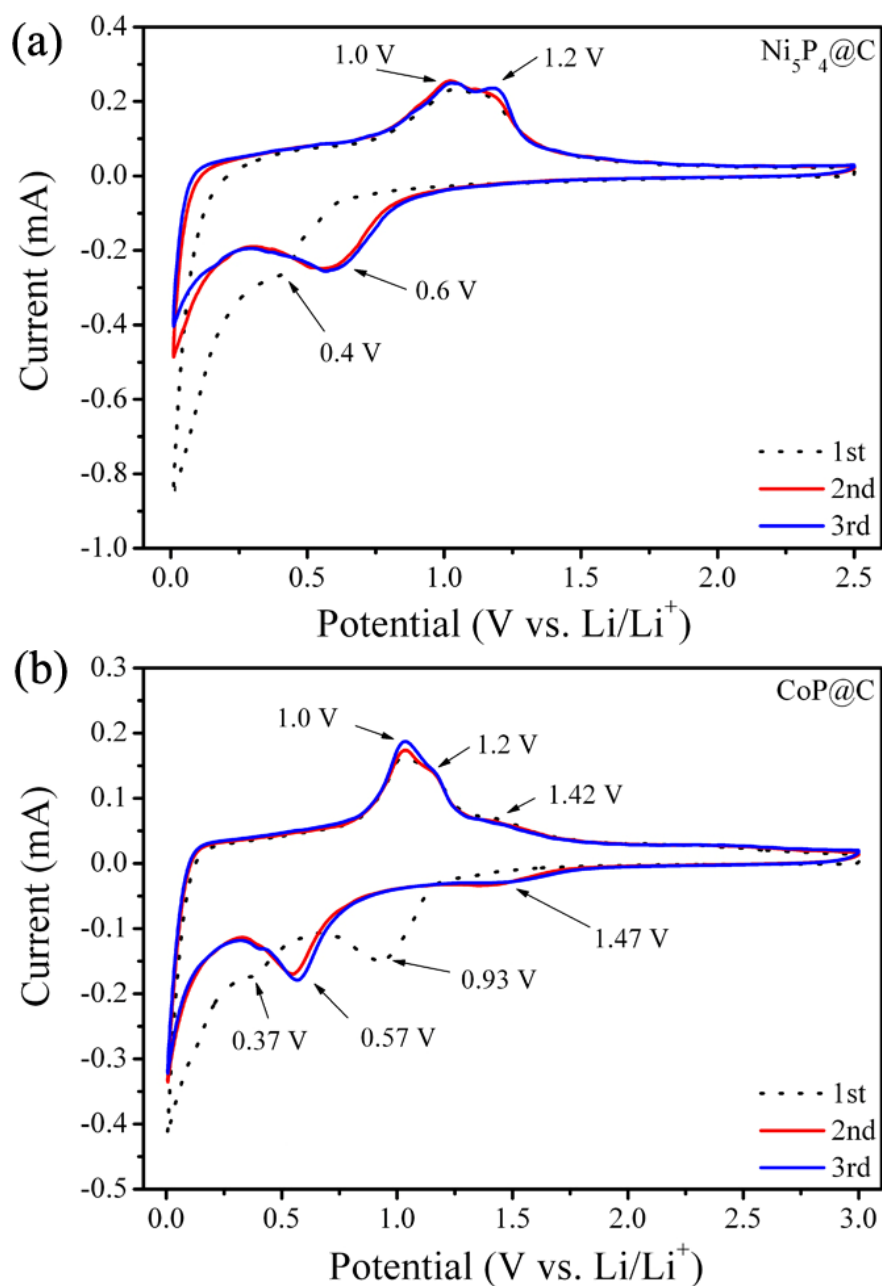

**Fig. S4.** (a) Cyclic voltammeteries of the Ni<sub>5</sub>P<sub>4</sub>@C nanoparticles between 0.01 and 2.5 V at a scan rate of 0.1 mV s<sup>-1</sup> for the 1st, 2nd and 3rd cycles, and (b) cyclic voltammeteries of the CoP@C nanorods between 0.01 and 3.0 V at a scan rate of 0.1 mV s<sup>-1</sup> for the 1st, 2nd and 3rd cycles.

**6. Table S2.** Comparison the as-prepared Ni<sub>5</sub>P<sub>4</sub>@C nanoparticles and CoP@C nanorods with previously reported transition-metal phosphide (TMP) structures.

| Material                              | Rate             | Reversible capacity based on the total mass of MP@C/mA h g <sup>-1</sup> | Reversible capacity based on the mass of MP/mA h g <sup>-1</sup>  | Ref.      |
|---------------------------------------|------------------|--------------------------------------------------------------------------|-------------------------------------------------------------------|-----------|
| Ni <sub>5</sub> P <sub>4</sub> @C NPs | 0.2C<br>1C<br>5C | 490/100 <sup>th</sup> cycle<br>370/200 <sup>th</sup> cycle<br>339        | 612/100 <sup>th</sup> cycle<br>462/200 <sup>th</sup> cycle<br>424 | This work |
| Ni <sub>5</sub> P <sub>4</sub> /C MPs | 0.1C<br>3C       | -<br>-                                                                   | 644/50 <sup>th</sup> cycle<br>357                                 | 16        |
| CoP@C NRs                             | 0.2C<br>1C<br>5C | 579/100 <sup>th</sup> cycle<br>469/200 <sup>th</sup> cycle<br>340        | 654/100 <sup>th</sup> cycle<br>530/200 <sup>th</sup> cycle<br>384 | This work |
| CoP@C NPs                             | 0.2C<br>1C<br>5C | -<br>-<br>-                                                              | 630/100 <sup>th</sup> cycle<br>352<br>256                         | 18        |

**7. The phase stability of the Ni<sub>5</sub>P<sub>4</sub>@C nanoparticles and CoP@C nanorods at high temperature.**

In order to test the phase stability of the as-prepared products, we load the as-prepared products in the sealed quartz tube and then annealing at 600 °C for 2h.

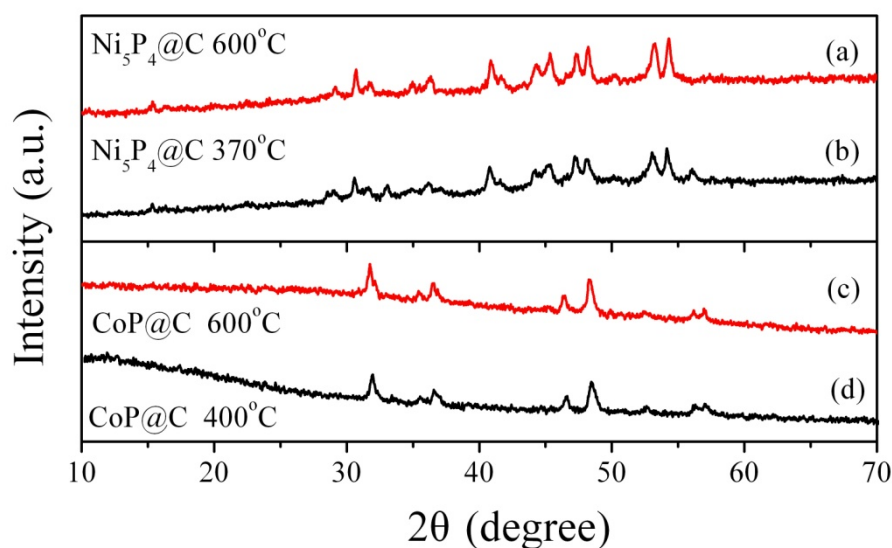

**Fig. S5.** XRD of the Ni<sub>5</sub>P<sub>4</sub>@C and CoP@C nanocomposites before/after annealing. (a) Ni<sub>5</sub>P<sub>4</sub>@C at 600 °C, (b) Ni<sub>5</sub>P<sub>4</sub>@C at 370 °C, and (c) CoP@C at 600 °C, (d) CoP@C at 400 °C.

## 8. Electrochemical performance of the Ni<sub>5</sub>P<sub>4</sub>@C nanoparticles and CoP@C nanorods in the full LIB cell.

We assemble the full LIB cell with the as-prepared products as anode and commercial LiCoO<sub>2</sub> as cathode. The loading mass of the products and LiCoO<sub>2</sub> on the electrode is ~0.5 mg and ~5.0 mg, respectively. Assuming a stable capacity delivery of 150 mA h g<sup>-1</sup> for the LiCoO<sub>2</sub> cathode,<sup>S1</sup> the anode electrode capacity is less than the cathode electrode capacity in the cell, so the capacity in the full LIB is limited by the anode material. Hence the capacity and current density in this work is based on the mass of anode materials. With the potential between 1.5 V and 3.6 V and the current density at 0.2C, the Ni<sub>5</sub>P<sub>4</sub>@C-LiCoO<sub>2</sub> full cell shows a discharge voltage of ~3.0 V, and the charge capacity and discharge capacity is ~510 mA h g<sup>-1</sup> and ~380 mA h g<sup>-1</sup>, respectively. With the same potential range and current density, the CoP@C-LiCoO<sub>2</sub> full cell shows a discharge voltage of ~3.0 V, and the charge capacity and discharge capacity is ~500 mA h g<sup>-1</sup> and ~350 mA h g<sup>-1</sup>, respectively.

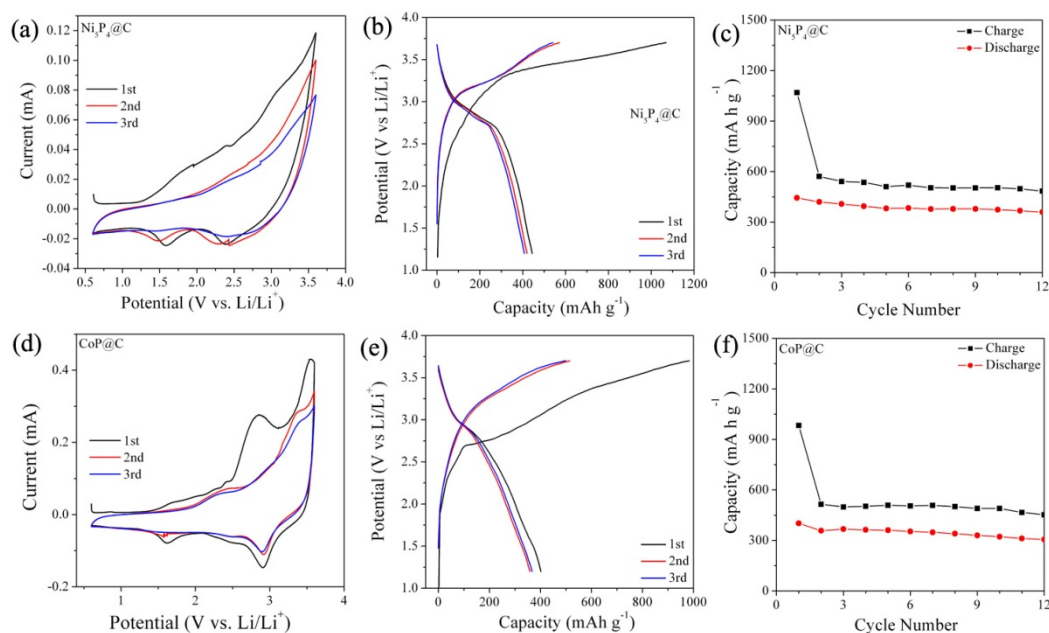

**Fig. S6.** (a) Cyclic voltammeteries of the Ni<sub>5</sub>P<sub>4</sub>@C, (b) charge-discharge voltage profiles for the Ni<sub>5</sub>P<sub>4</sub>@C at 0.2C, (c) cycle performance of the Ni<sub>5</sub>P<sub>4</sub>@C at 0.2C, and (d) cyclic voltammeteries of the CoP@C, (e) charge-discharge voltage profiles for the CoP@C, and (f) cycle performance of the CoP@C at 0.2C.

**9. TEM images of the Ni<sub>5</sub>P<sub>4</sub>@C nanoparticles and CoP@C nanorods after cycling at 0.2C.**

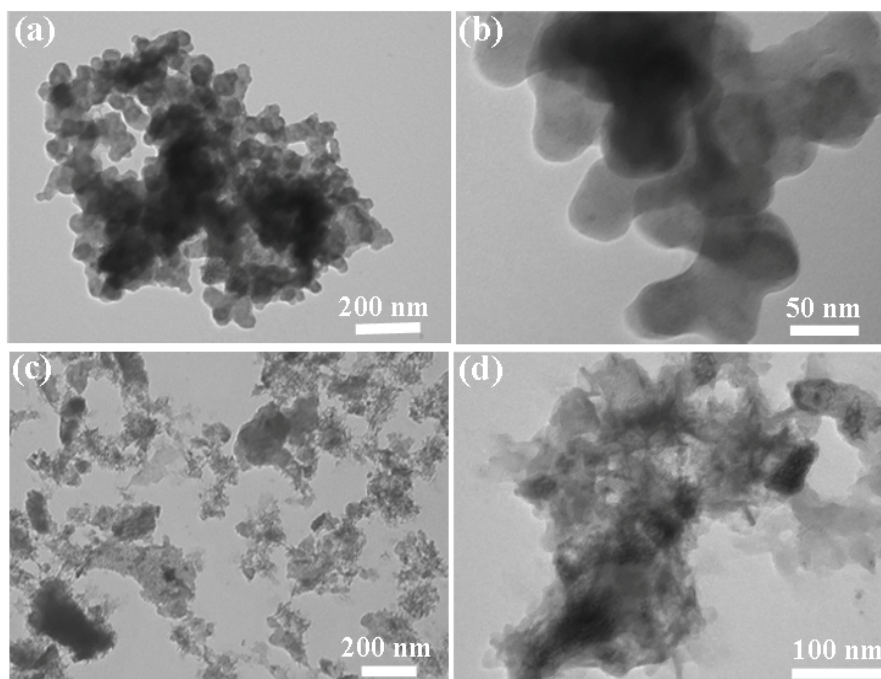

**Fig. S7.** (a), (b) TEM images of Ni<sub>5</sub>P<sub>4</sub>@C nanoparticles after 100 cycles at 0.2C in the cell, and (c), (d) TEM images of CoP@C nanorods after 100 cycles at 0.2C in the cell.

**10. Synthesis and characterization of NiP<sub>2</sub>@C microsphere.**

Through increasing the molar ratio of the Ni(acac)<sub>2</sub> and PPh<sub>3</sub> to 1:10, improving the reaction temperature to 400 °C and even extending the reaction time to 5h, we try to synthesize the phase of NiP<sub>2</sub>. As shown in Fig. S8, the major peaks can be indexed to cubic NiP<sub>2</sub> (73-0436), but several negligible peaks located at 15°, 30°, 53° and 54° suggest the co-existence of slight Ni<sub>5</sub>P<sub>4</sub> impurity phase in the products.

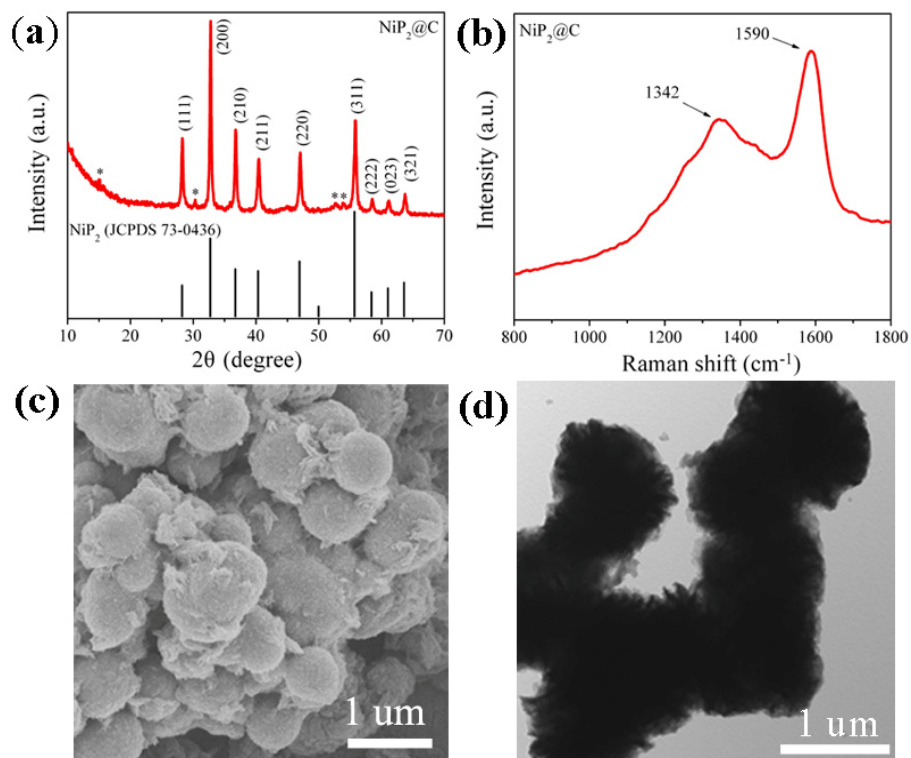

**Fig. S8.** (a) XRD, (b) Raman spectra, (c) SEM image and (d) TEM image of the as-prepared NiP<sub>2</sub>@C composites.

### Reference

S1. J. Liang, X. Li, Z. Hou, T. Zhang, Y. Zhu, X. Yan and Y. Qian, *Chem. Mater.* 2015, **27**, 4156-4164.
